# Supplementary material for: Heme oxygenase-1 orchestrates the immunosuppressive program of tumor-associated macrophages
Source: JCI journal article supplement (doi:10.1172/jci.insight.133929), 2020-05-05
Supplement: sd1 [file 1]

A

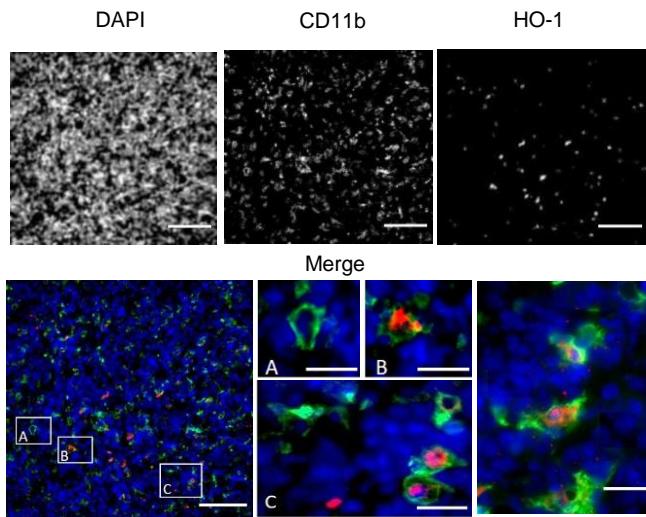

B

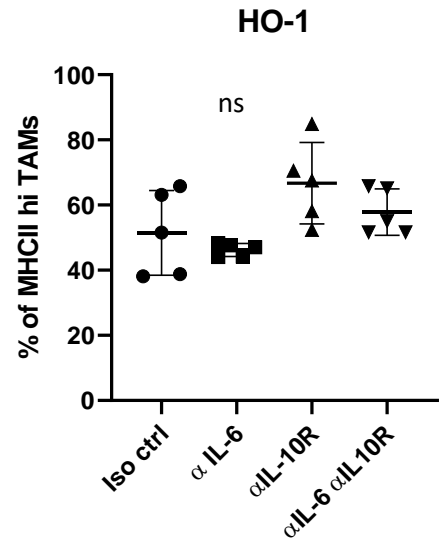

**Supplemental Figure 1. HO-1 expression by TAMs.** A) HO-1 staining (in red) combined with DAPI co-staining showing nuclei (in blue) are visualized in tumor slices by immunofluorescence in CD11b<sup>+</sup> myeloid cells (in green) in an EG7-OVA tumor 21 days after tumor inoculation in a wild type mouse. Scale bar = 5  $\mu$ m. B) HO-1 expression measured by flow cytometry among CD11b<sup>hi</sup>Ly6G<sup>lo</sup>Ly6C<sup>lo</sup>CD64<sup>+</sup>MHCII<sup>+</sup> TAMs from EG7-OVA tumor 16 days after inoculation in wild type mice, after in vivo neutralization of IL-6, IL-10, or both (n=5). \*P<0,05; \*\*P<0,01; \*\*\*P<0,001; \*\*\*\*P<0,0001, ns: not significant. .Kruskal-Wallis and Dunn's multiple comparisons test.

Figure S2

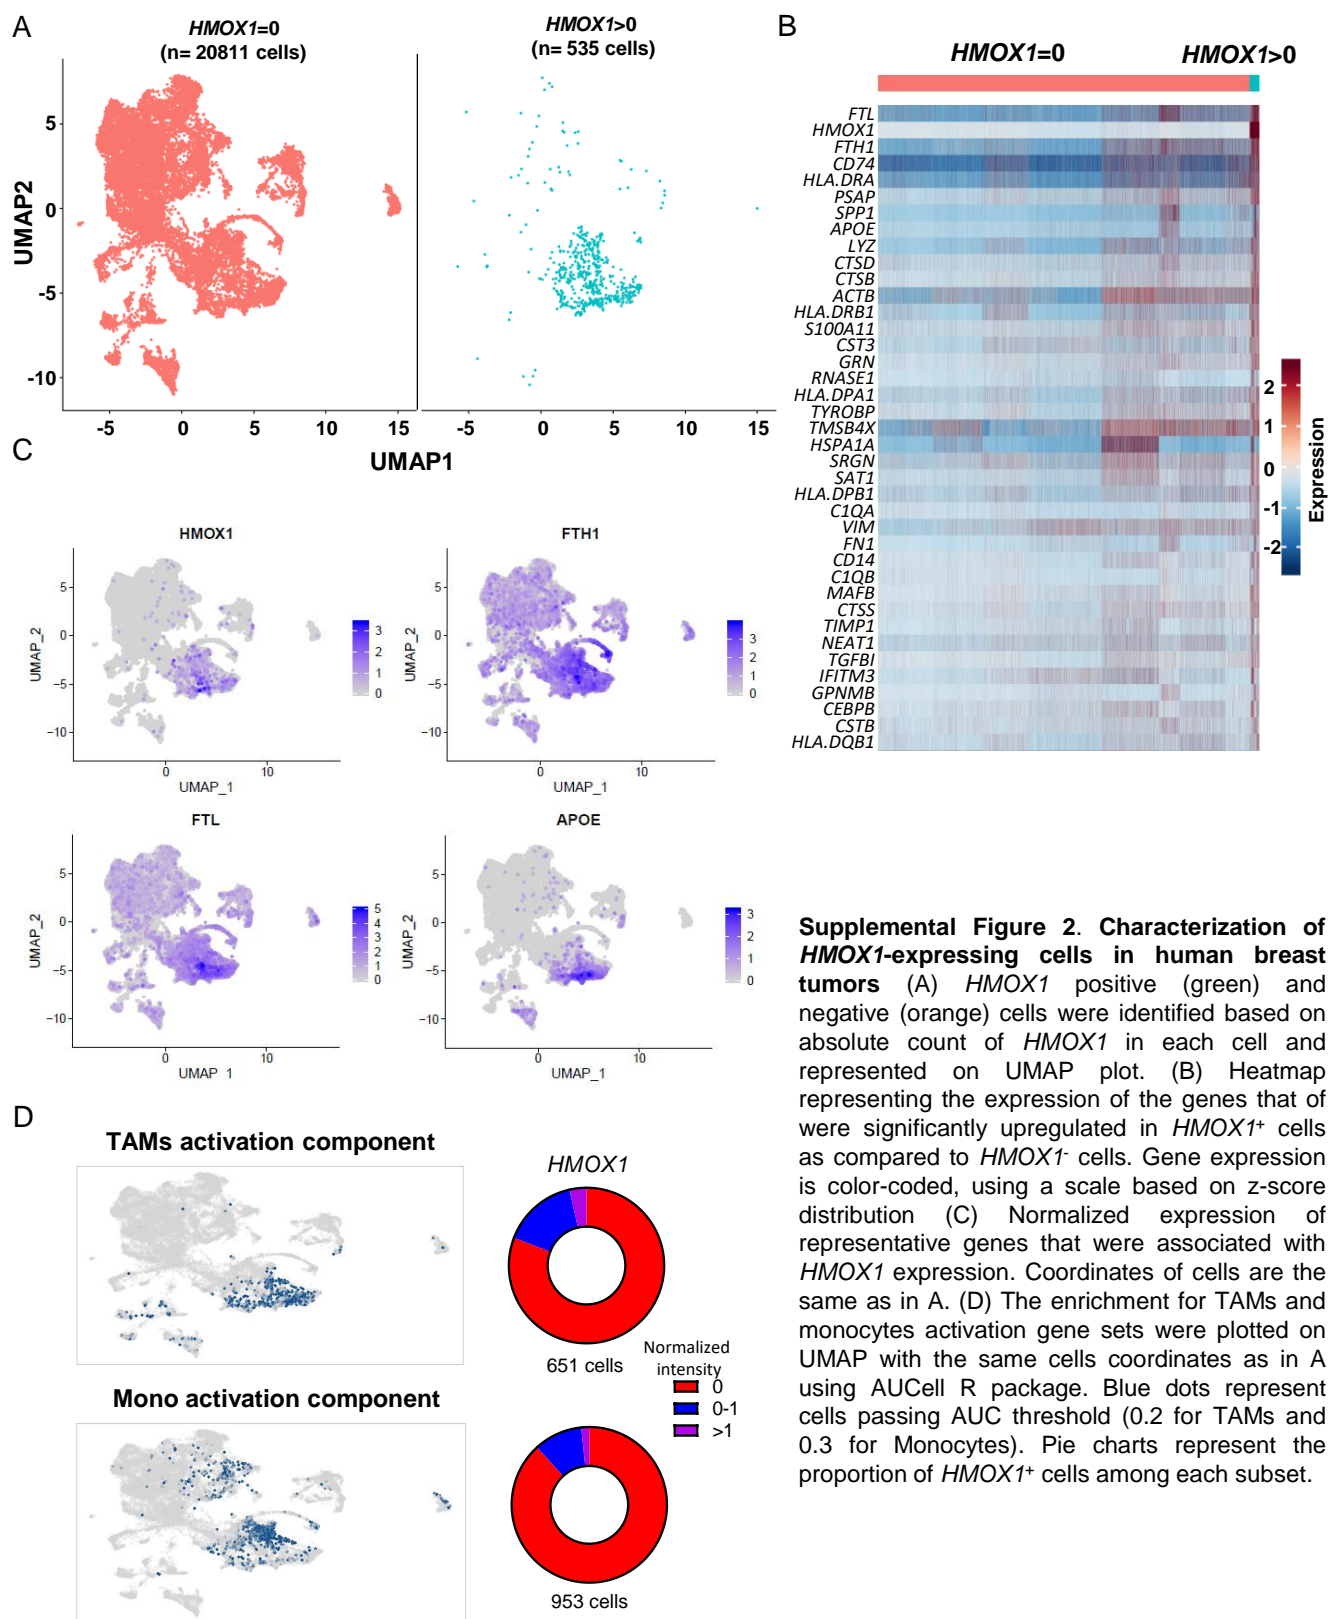

Figure S3

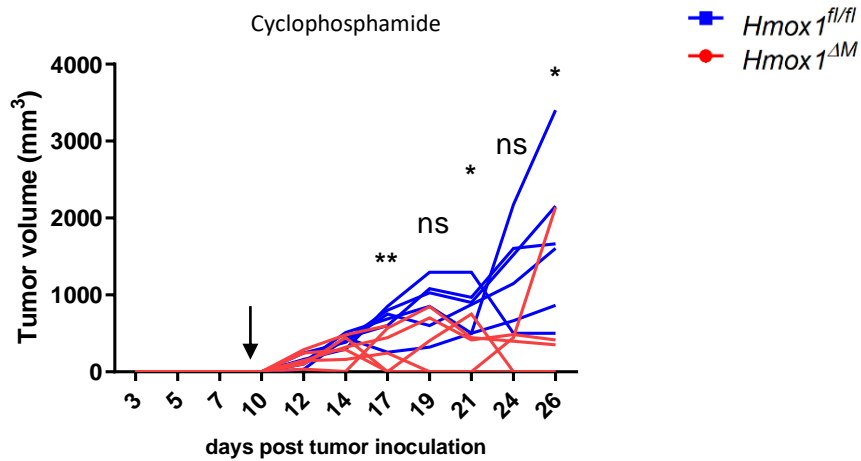

**Supplemental Figure 3. Myeloid HO-1 inhibition improves the antitumor effect of cyclophosphamide treatment.** EG7-OVA tumor cells were inoculated intradermally at day 0 on the right flank of *Hmox1<sup>ΔM</sup>* mice (n = 6). All mice were injected with cyclophosphamide (i.p.) at day 10 post tumor inoculation. Their tumor volumes were compared to *Hmox1<sup>fl/fl</sup>* littermates (n = 6) at regular intervals following implantation. Statistical analysis was performed with Mann-Whitney U test. \*P<0,05; \*\*P<0,01; \*\*\*P<0,001; \*\*\*\*P<0,0001.

A

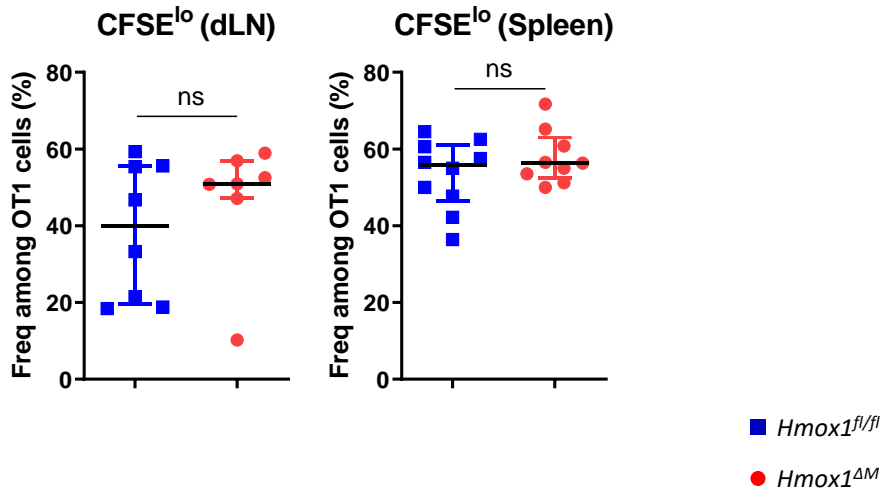

B

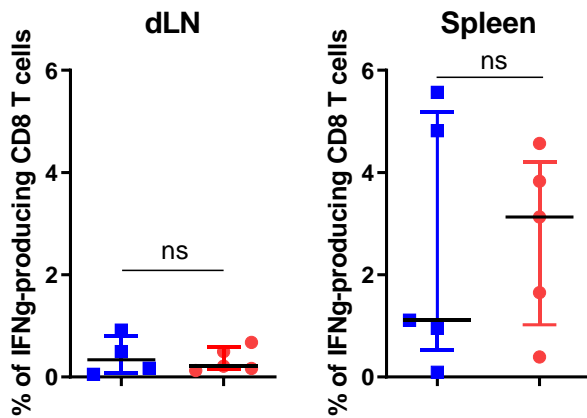

**Supplemental Figure 4. Myeloid HO-1 inhibition has no impact on T-cell priming in the secondary lymphoid organs.** Intravenous adoptive transfer of CFSE labelled OT-1 cells ( $2 \times 10^6$  cells/mouse) was performed 10 days after tumor inoculation. This was followed by an immunization with subcutaneous injection of ovalbumin protein (50  $\mu$ g/mouse) and poly(I:C) (50  $\mu$ g/mouse) one hour later on the right flank of the animals. Two days later, EG7-OVA tumors were enzymatically and mechanistically digested and analyzed by flow cytometry. A) Tumor-infiltrating OT-1 cell proliferation assessed by CFSE dilution in the axillary and inguinal draining lymph nodes on the right flank and the spleen of *Hmox1<sup>ΔM</sup>* mice and *Hmox1<sup>fl/fl</sup>* littermates mice. dLN: n=8 (littermates) or n=7 (*Hmox1<sup>ΔM</sup>* mice). Spleen: n=10 (littermates) or n=9 (*Hmox1<sup>ΔM</sup>* mice). B) Production of IFN $\gamma$  was assessed by ex vivo stimulation overnight with OVA SIINFEKL peptide (and brefeldin A added 2 hours later). dLN: n=4 (littermates) or n=5 (*Hmox1<sup>ΔM</sup>* mice). Spleen: n=5 (littermates) or n=5 (*Hmox1<sup>ΔM</sup>* mice). Horizontal bars indicate median  $\pm$  interquartile. Statistical analysis was performed with Mann-Whitney U test. \*P<0,05; \*\*P<0,01; \*\*\*P<0,001; \*\*\*\*P<0,0001.
